# Supplementary material
Source: publisher figshare collection journal article supplement (https://future-science-group.figshare.com/ndownloader/files/31489571)
Supplement: Supplementary file 1 [file 31489571]

## Sheet: Sheet1
SRA database samples were used in this study
SRA	tissue	isFromPatient	isCancerTissue
ERR1518669	Thyroid	yes	cancer
ERR1518671	Thyroid	yes	cancer
ERR1518672	Thyroid	yes	cancer
ERR1518674	Thyroid	yes	cancer
ERR1518675	Thyroid	yes	cancer
ERR1518677	Thyroid	yes	cancer
ERR1518678	Thyroid	yes	cancer
ERR1518679	Thyroid	yes	cancer
ERR1518681	Thyroid	yes	cancer
ERR1518683	Thyroid	yes	cancer
ERR1518685	Thyroid	yes	cancer
ERR1518687	Thyroid	yes	cancer
ERR1518689	Thyroid	yes	cancer
ERR1518691	Thyroid	yes	cancer
ERR1518693	Thyroid	yes	cancer
ERR1518695	Thyroid	yes	cancer
ERR1518697	Thyroid	yes	cancer
ERR1518699	Thyroid	yes	cancer
ERR1518701	Thyroid	yes	cancer
ERR1518702	Thyroid	yes	cancer
ERR1518704	Thyroid	yes	cancer
ERR1518705	Thyroid	yes	cancer
ERR1518707	Thyroid	yes	cancer
ERR1518709	Thyroid	yes	cancer
ERR1518711	Thyroid	yes	cancer
ERR1518713	Thyroid	yes	cancer
ERR1518714	Thyroid	yes	cancer
ERR1518715	Thyroid	yes	cancer
ERR1518716	Thyroid	yes	cancer
ERR1518717	Thyroid	yes	cancer
ERR1518718	Thyroid	yes	cancer
ERR1518720	Thyroid	yes	cancer
ERR1518721	Thyroid	yes	cancer
ERR1518722	Thyroid	yes	cancer
ERR1518725	Thyroid	yes	cancer
ERR1518726	Thyroid	yes	cancer
ERR1518727	Thyroid	yes	cancer
ERR1518729	Thyroid	yes	cancer
ERR1518730	Thyroid	yes	cancer
ERR1518731	Thyroid	yes	cancer
ERR1518732	Thyroid	yes	cancer
ERR1518733	Thyroid	yes	cancer
ERR1518734	Thyroid	yes	cancer
ERR1518735	Thyroid	yes	cancer
ERR1518736	Thyroid	yes	cancer
ERR1518737	Thyroid	yes	cancer
ERR1518738	Thyroid	yes	cancer
ERR1518739	Thyroid	yes	cancer
ERR1518740	Thyroid	yes	cancer
ERR1518741	Thyroid	yes	cancer
ERR1518742	Thyroid	yes	cancer
ERR1518743	Thyroid	yes	cancer
ERR1518744	Thyroid	yes	cancer
ERR1518745	Thyroid	yes	cancer
ERR1518746	Thyroid	yes	cancer
ERR1518747	Thyroid	yes	cancer
ERR1518748	Thyroid	yes	cancer
ERR1518750	Thyroid	yes	cancer
ERR1518752	Thyroid	yes	cancer
ERR1518754	Thyroid	yes	cancer
ERR1518756	Thyroid	yes	cancer
ERR1518758	Thyroid	yes	cancer
ERR1518760	Thyroid	yes	cancer
ERR1518762	Thyroid	yes	cancer
ERR1518764	Thyroid	yes	cancer
ERR1518766	Thyroid	yes	cancer
ERR1518767	Thyroid	yes	cancer
ERR1518768	Thyroid	yes	cancer
ERR1518769	Thyroid	yes	cancer
ERR1518770	Thyroid	yes	cancer
ERR1518771	Thyroid	yes	cancer
ERR1518772	Thyroid	yes	cancer
ERR1518773	Thyroid	yes	cancer
ERR1518774	Thyroid	yes	cancer
ERR1518775	Thyroid	yes	cancer
ERR1518776	Thyroid	yes	cancer
ERR1518777	Thyroid	yes	cancer
ERR1518778	Thyroid	yes	cancer
ERR1518779	Thyroid	yes	cancer
ERR1518780	Thyroid	yes	cancer
ERR1518781	Thyroid	yes	cancer
ERR1518782	Thyroid	yes	cancer
ERR1518783	Thyroid	yes	cancer
ERR1518784	Thyroid	yes	cancer
ERR1518785	Thyroid	yes	cancer
ERR1518786	Thyroid	yes	cancer
ERR1518787	Thyroid	yes	cancer
ERR1518788	Thyroid	yes	cancer
ERR1518789	Thyroid	yes	cancer
ERR1518790	Thyroid	yes	cancer
ERR1518791	Thyroid	yes	cancer
ERR1518792	Thyroid	yes	cancer
ERR1518793	Thyroid	yes	cancer
ERR1518794	Thyroid	yes	cancer
ERR1518795	Thyroid	yes	cancer
ERR1518796	Thyroid	yes	cancer
ERR1518797	Thyroid	yes	cancer
ERR1518798	Thyroid	yes	cancer
ERR1518799	Thyroid	yes	cancer
ERR1518800	Thyroid	yes	cancer
ERR1518801	Thyroid	yes	cancer
ERR1518802	Thyroid	yes	cancer
ERR1518804	Thyroid	yes	cancer
ERR1518806	Thyroid	yes	cancer
ERR1518808	Thyroid	yes	cancer
ERR1518810	Thyroid	yes	cancer
ERR1518812	Thyroid	yes	cancer
ERR1518814	Thyroid	yes	cancer
ERR1518816	Thyroid	yes	cancer
ERR1518818	Thyroid	yes	cancer
ERR1518819	Thyroid	yes	cancer
ERR1518823	Thyroid	yes	cancer
ERR1518825	Thyroid	yes	cancer
ERR1518826	Thyroid	yes	cancer
ERR1518828	Thyroid	yes	cancer
ERR1518830	Thyroid	yes	cancer
ERR1518831	Thyroid	yes	cancer
ERR1518833	Thyroid	yes	cancer
ERR1518835	Thyroid	yes	cancer
ERR1518839	Thyroid	yes	cancer
ERR1518840	Thyroid	yes	cancer
ERR1518842	Thyroid	yes	cancer
ERR1518844	Thyroid	yes	cancer
ERR1518845	Thyroid	yes	cancer
ERR1518847	Thyroid	yes	cancer
ERR1518849	Thyroid	yes	cancer
ERR1518851	Thyroid	yes	cancer
ERR1518853	Thyroid	yes	cancer
ERR1518855	Thyroid	yes	cancer
ERR1518857	Thyroid	yes	cancer
ERR1518859	Thyroid	yes	cancer
ERR1518861	Thyroid	yes	cancer
ERR1518863	Thyroid	yes	cancer
ERR1518864	Thyroid	yes	cancer
ERR1518865	Thyroid	yes	cancer
ERR1518866	Thyroid	yes	cancer
ERR1518867	Thyroid	yes	cancer
ERR1518870	Thyroid	yes	cancer
ERR1518871	Thyroid	yes	cancer
ERR1518872	Thyroid	yes	cancer
ERR1518874	Thyroid	yes	cancer
ERR1518875	Thyroid	yes	cancer
ERR1518876	Thyroid	yes	cancer
ERR1518877	Thyroid	yes	cancer
ERR1518878	Thyroid	yes	cancer
ERR1518879	Thyroid	yes	cancer
ERR1518883	Thyroid	yes	cancer
ERR1518884	Thyroid	yes	cancer
ERR1518885	Thyroid	yes	cancer
SRR1658409	Thyroid	yes	cancer
SRR1658410	Thyroid	yes	cancer
SRR1658411	Thyroid	yes	cancer
SRR1658412	Thyroid	yes	cancer
SRR1658413	Thyroid	yes	cancer
SRR1658414	Thyroid	yes	cancer
SRR1658415	Thyroid	yes	cancer
SRR1658416	Thyroid	yes	cancer
SRR1658417	Thyroid	yes	normal
SRR1658418	Thyroid	yes	normal
SRR1658419	Thyroid	yes	normal
SRR1658420	Thyroid	yes	normal
SRR1658421	Thyroid	yes	normal
SRR1658422	Thyroid	yes	normal
SRR1658423	Thyroid	yes	normal
SRR1658424	Thyroid	yes	normal
SRR1754117	Thyroid	yes	cancer
SRR1754118	Thyroid	yes	cancer
SRR1754119	Thyroid	yes	cancer
SRR1754120	Thyroid	yes	cancer
SRR1754121	Thyroid	yes	cancer
SRR1754122	Thyroid	yes	cancer
SRR1754123	Thyroid	yes	cancer
SRR1754124	Thyroid	yes	cancer
SRR1754127	Thyroid	yes	cancer
SRR1754128	Thyroid	yes	cancer
SRR1754129	Thyroid	yes	cancer
SRR1754130	Thyroid	yes	cancer
SRR1754131	Thyroid	yes	cancer
SRR1754132	Thyroid	yes	cancer
SRR1754133	Thyroid	yes	cancer
SRR1754134	Thyroid	yes	cancer
SRR1754135	Thyroid	yes	cancer
SRR1754138	Thyroid	yes	cancer
SRR6796364	Thyroid	yes	cancer
SRR6796365	Thyroid	yes	cancer
SRR6888686	Thyroid	yes	cancer
SRR6888687	Thyroid	yes	cancer
SRR6888688	Thyroid	yes	cancer
SRR6888689	Thyroid	yes	cancer
SRR6888691	Thyroid	yes	cancer
SRR6888692	Thyroid	yes	cancer
SRR6888693	Thyroid	yes	cancer
SRR6888694	Thyroid	yes	cancer
SRR6888704	Thyroid	yes	cancer
SRR6888706	Thyroid	yes	cancer
SRR6888708	Thyroid	yes	cancer
SRR6888709	Thyroid	yes	cancer
SRR6888710	Thyroid	yes	cancer
SRR6888711	Thyroid	yes	cancer
SRR6888712	Thyroid	yes	cancer
SRR6888713	Thyroid	yes	cancer
SRR6888714	Blood	yes	normal
SRR6888724	Thyroid	yes	cancer
SRR6888726	Thyroid	yes	cancer
SRR6888727	Thyroid	yes	cancer
SRR6888728	Thyroid	yes	cancer
SRR6888729	Thyroid	yes	cancer
SRR6888730	Thyroid	yes	cancer
SRR6888731	Thyroid	yes	cancer
SRR6888732	Thyroid	yes	cancer
SRR6888733	Thyroid	yes	cancer
SRR6888734	Thyroid	yes	cancer
SRR6888766	Thyroid	yes	cancer
SRR6888776	Thyroid	yes	cancer
SRR6888777	Thyroid	yes	cancer
SRR6888778	Thyroid	yes	cancer
SRR6888779	Thyroid	yes	cancer
SRR6888780	Thyroid	yes	cancer
SRR6888781	Thyroid	yes	cancer
SRR6888782	Thyroid	yes	cancer
SRR6888783	Thyroid	yes	cancer
SRR6888784	Thyroid	yes	cancer
SRR6888792	Thyroid	yes	cancer
SRR6888795	Thyroid	yes	cancer
SRR6888802	Thyroid	yes	cancer
SRR6888808	Thyroid	yes	cancer
SRR6888812	Thyroid	yes	cancer
SRR6888818	Thyroid	yes	cancer
SRR6888819	Thyroid	yes	cancer
SRR6888820	Thyroid	yes	cancer
SRR6888822	Blood	yes	normal
SRR6888823	Thyroid	yes	cancer
SRR6888824	Thyroid	yes	cancer
SRR6888825	Thyroid	yes	cancer
SRR6888826	Thyroid	yes	cancer
SRR6888827	Thyroid	yes	cancer
SRR7540961	Thyroid	yes	cancer
SRR935662	Thyroid	yes	cancer
SRR935663	Thyroid	yes	cancer
SRR935667	Thyroid	yes	cancer
SRR935668	Thyroid	yes	cancer
SRR935669	Thyroid	yes	cancer
SRR935670	Thyroid	yes	cancer
SRR935671	Thyroid	yes	cancer
SRR935672	Thyroid	yes	cancer
SRR935673	Thyroid	yes	cancer
SRR935674	Thyroid	yes	cancer
SRR935675	Thyroid	yes	cancer
SRR935676	Thyroid	yes	cancer
SRR935677	Thyroid	yes	cancer
SRR935678	Thyroid	yes	cancer
SRR935679	Thyroid	yes	cancer
SRR935680	Thyroid	yes	cancer
SRR935681	Thyroid	yes	cancer
